# Supplementary material for: Risk Behaviours among Female Sex Workers in China: A Systematic Review and Data Synthesis
Source: PubMed Central journal article supplement (PMC4376708; doi:10.1371/journal.pone.0120595), 2015-03-27
Supplement: pone.0120595.s002.pdf [file pone.0120595.s002.pdf]

## Checklist S2. Quality Assessment Checklist

|   | <b>Bias</b>                                                    | <b>Decision criteria</b>                                                                                                                                                                                                                                                                                                                                                                                                                                                                                                                                                                                  | <b>Score</b> |
|---|----------------------------------------------------------------|-----------------------------------------------------------------------------------------------------------------------------------------------------------------------------------------------------------------------------------------------------------------------------------------------------------------------------------------------------------------------------------------------------------------------------------------------------------------------------------------------------------------------------------------------------------------------------------------------------------|--------------|
| 1 | <b>Methods for selecting study participants</b>                | Appropriate source population (cases, controls and cohorts) and inclusion or exclusion criteria                                                                                                                                                                                                                                                                                                                                                                                                                                                                                                           | 1            |
|   |                                                                | Inappropriate source population (cases, controls and cohorts) and inclusion or exclusion criteria                                                                                                                                                                                                                                                                                                                                                                                                                                                                                                         | 0            |
|   |                                                                | Not reported                                                                                                                                                                                                                                                                                                                                                                                                                                                                                                                                                                                              | 0            |
| 2 | <b>Methods for measuring exposure and outcome variables</b>    | Appropriate measurement methods for both exposure(s) and/or outcome(s)                                                                                                                                                                                                                                                                                                                                                                                                                                                                                                                                    | 1            |
|   |                                                                | Inappropriate measurement methods for both exposure(s) and/or outcome(s), e.g. did not report the duration of measurement (condom use in past x months)                                                                                                                                                                                                                                                                                                                                                                                                                                                   | 0            |
|   |                                                                | Not reported                                                                                                                                                                                                                                                                                                                                                                                                                                                                                                                                                                                              | 0            |
| 3 | <b>Design-specific sources of bias (excluding confounding)</b> | Appropriate methods outlined to deal with any design-specific issues such as recall bias, interviewer bias, biased loss to follow or blinding                                                                                                                                                                                                                                                                                                                                                                                                                                                             | 1            |
|   |                                                                | Inappropriate methods outlined to deal with any design-specific issues such as selection bias, performance bias, attrition bias, detection bias, or reporting bias <ul style="list-style-type: none"> <li>• Did not apply inclusion/exclusion criteria uniformly to all comparison groups</li> <li>• Did not rule out any impact from a concurrent intervention or an unintended exposure that might bias results</li> <li>• The study did not maintain fidelity to the intervention protocol</li> <li>• Outcomes were not assessed and implemented consistently across all study participants</li> </ul> | 0            |
|   |                                                                | Not reported                                                                                                                                                                                                                                                                                                                                                                                                                                                                                                                                                                                              | 0            |
| 4 | <b>Methods to control confounding</b>                          | Appropriate design and/or analytical methods                                                                                                                                                                                                                                                                                                                                                                                                                                                                                                                                                              | 1            |
|   |                                                                | Inappropriate design and/or analytical methods, and did not consider possible confounding                                                                                                                                                                                                                                                                                                                                                                                                                                                                                                                 | 0            |
|   |                                                                | Not reported                                                                                                                                                                                                                                                                                                                                                                                                                                                                                                                                                                                              | 0            |
| 5 | <b>Statistical methods (excluding control of confounding)</b>  | Appropriate use of statistics for primary analysis of effect                                                                                                                                                                                                                                                                                                                                                                                                                                                                                                                                              | 1            |
|   |                                                                | Inappropriate use of statistics for primary analysis of effect                                                                                                                                                                                                                                                                                                                                                                                                                                                                                                                                            | 0            |
|   |                                                                | Not reported                                                                                                                                                                                                                                                                                                                                                                                                                                                                                                                                                                                              | 0            |
| 6 | <b>Conflict of interest</b>                                    | Declarations of no conflict of interest or identification of funding sources                                                                                                                                                                                                                                                                                                                                                                                                                                                                                                                              | 1            |
|   |                                                                | Reported conflict of interest                                                                                                                                                                                                                                                                                                                                                                                                                                                                                                                                                                             | 0            |
|   |                                                                | Not reported                                                                                                                                                                                                                                                                                                                                                                                                                                                                                                                                                                                              | 0            |
